# Supplementary material for: STAT3 Mutation Is Associated with STAT3 Activation in CD30+ ALK− ALCL
Source: PubMed Central journal article supplement (PMC7140109; doi:10.3390/cancers12030702), 2020-03-16
Supplement: cancers-12-00702-s001.pdf [file cancers-12-00702-s001.pdf]

## Supplementary Materials: *STAT3* Mutation Is Associated with *STAT3* Activation in CD30<sup>+</sup> ALK<sup>-</sup> ALCL

Emma I. Andersson, Oscar Brück, Till Braun, Susanna Mannisto, Leena Saikko, Sonja Lagström, Pekka Ellonen, Sirpa Leppä, Marco Herling, Panu E. Kovanen and Satu Mustjoki

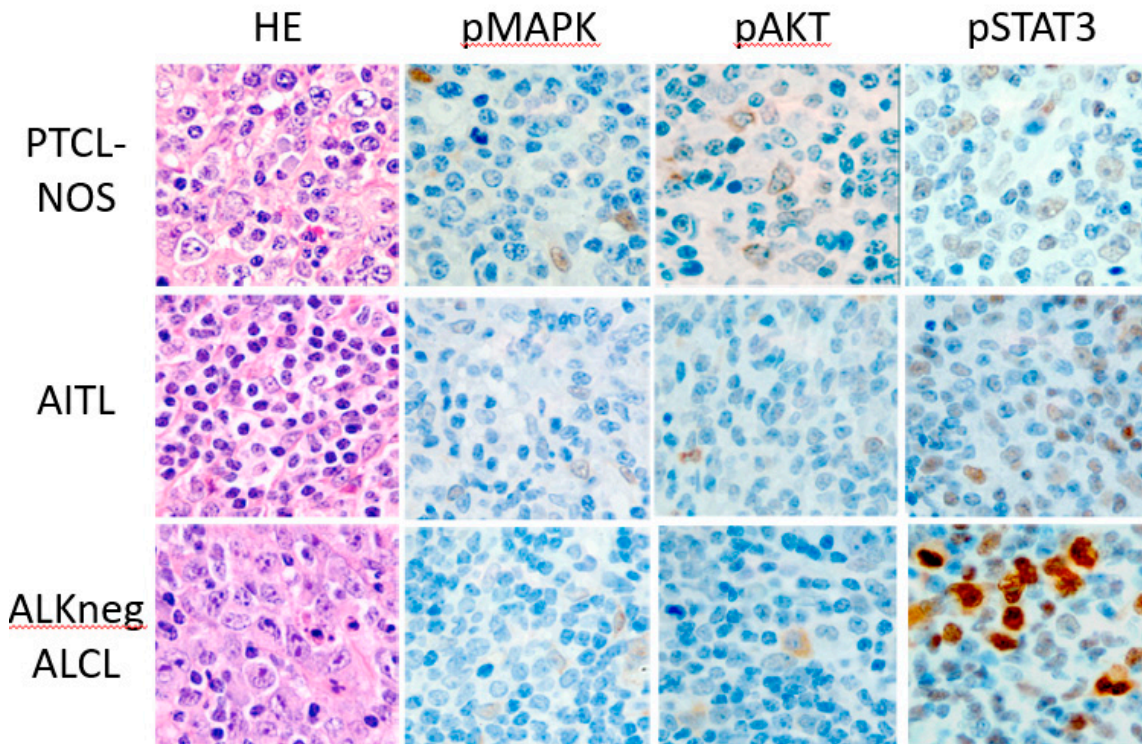

**Figure S1.** pMAPK, pAKT and pSTAT3 staining of peripheral T-cell lymphomas (PTCLs); not otherwise specified (NOS), angioimmunoblastic T-cell lymphoma (AITL) and ALK negative anaplastic large cell lymphoma (ALCL).

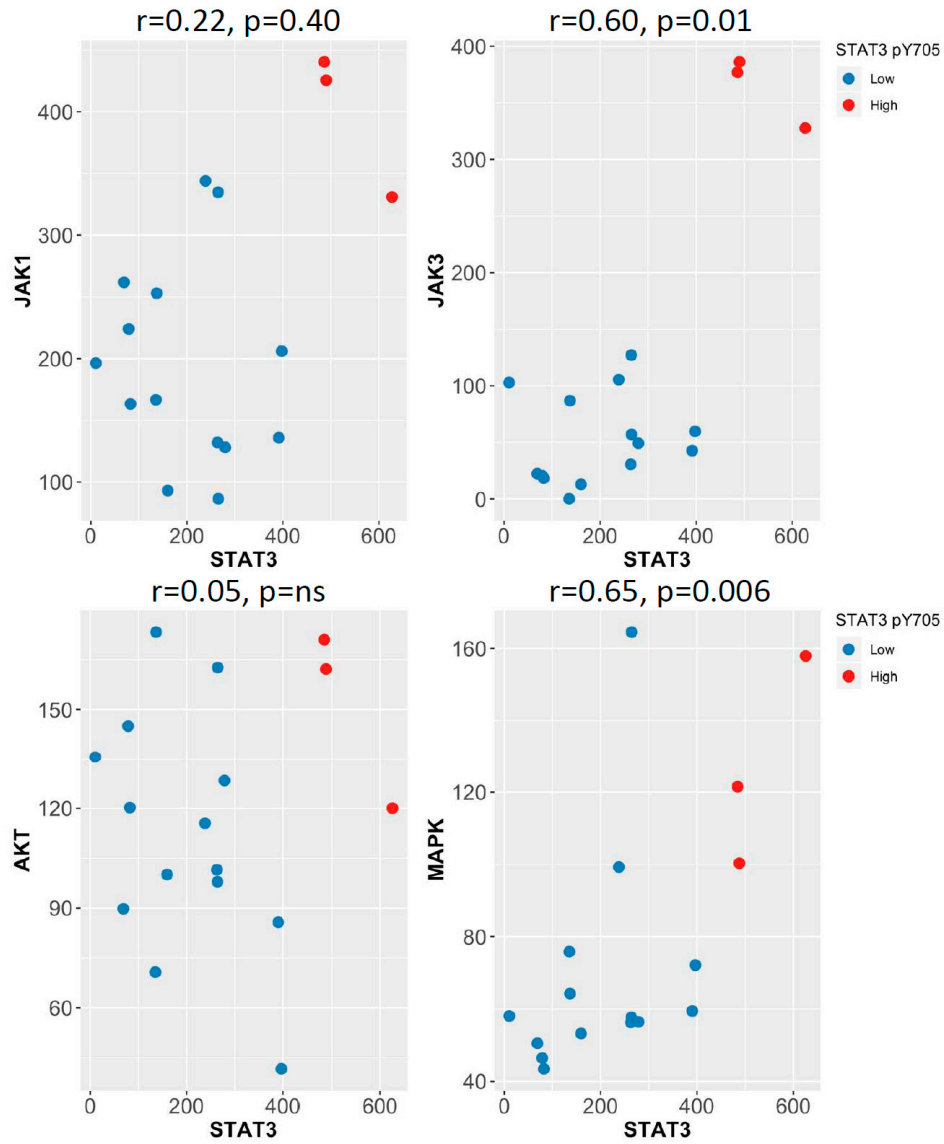

**Figure S2.** STAT3 expression was correlated (Spearman correlation) with JAK1, JAK3, AKT (arithmetic mean of AKT1 and AKT3) and MAPK (arithmetic mean of MAPK6, MAPK11, MAPK12 and MAPK14) expression (CPM) in T-cell neoplasia cell lines from the CCLE dataset. Cell lines are labelled based on STAT3 phosphorylation defined with RPPA.

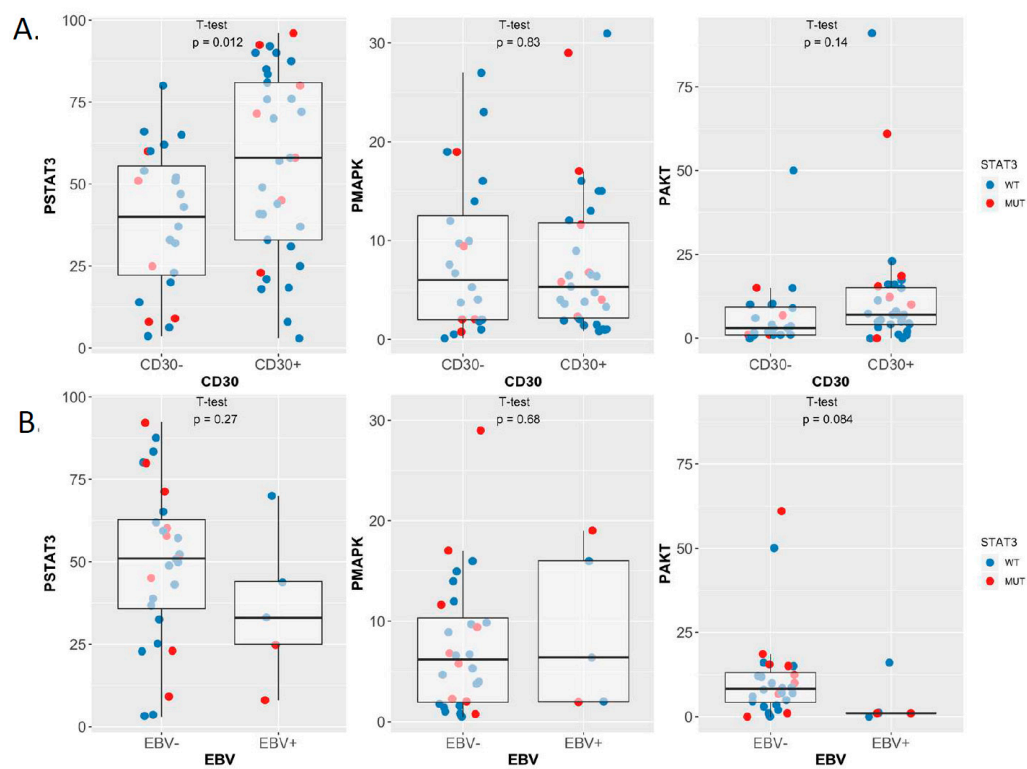

**Figure S3.** (A) Comparison between pSTAT3, pMAPK and pAKT expression and tumor CD30 and (B) EBV phenotype with unpaired t-test.

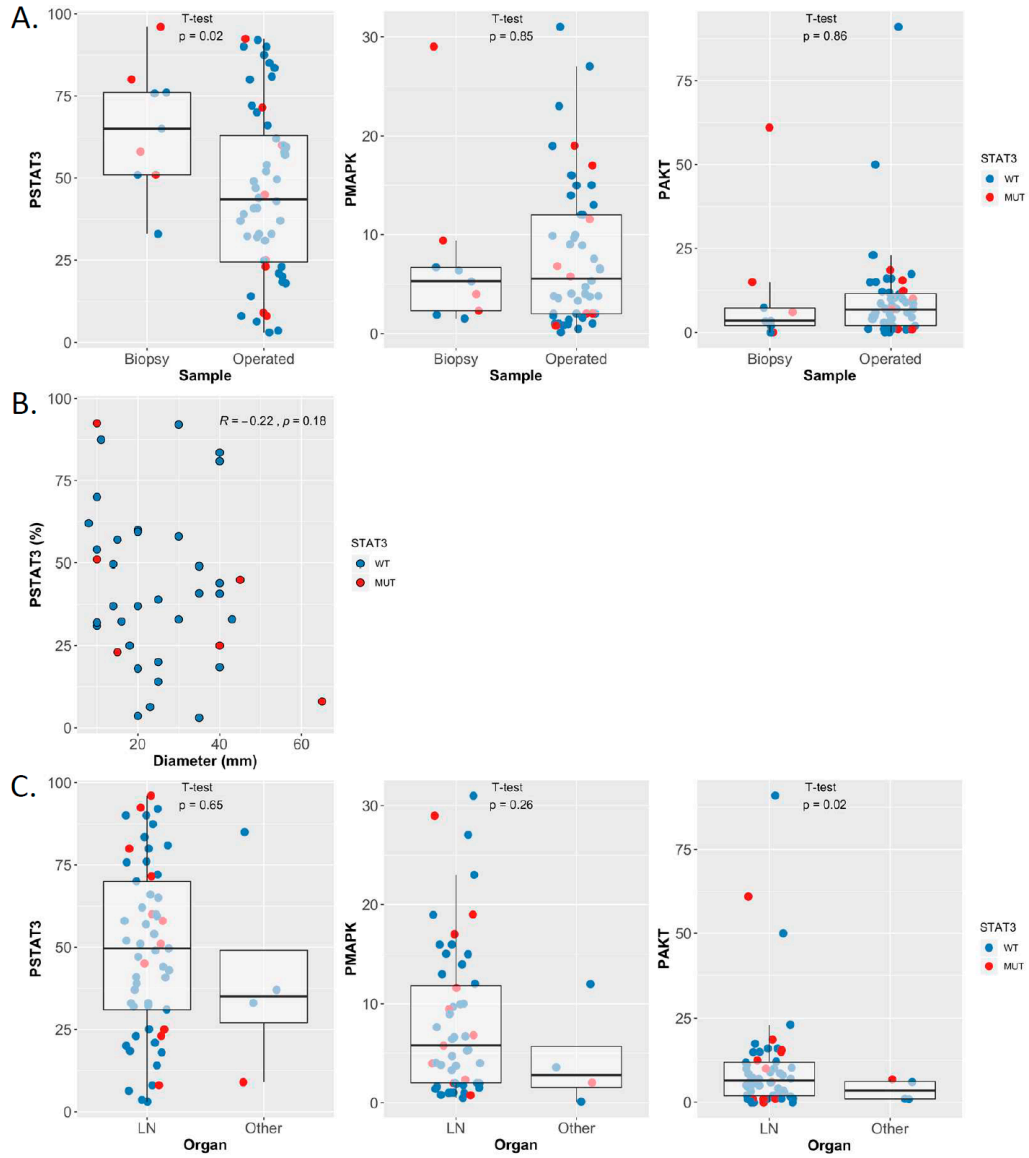

**Figure S4.** (A) Comparison between pSTAT3, pMAPK and pAKT expression and sample type. (B) Pearson correlation between pSTAT3 expression and sample diameter. (C) Comparison between pSTAT3, pMAPK and pAKT expression and organ origin of the sample. Unpaired T-test has been used for comparison.

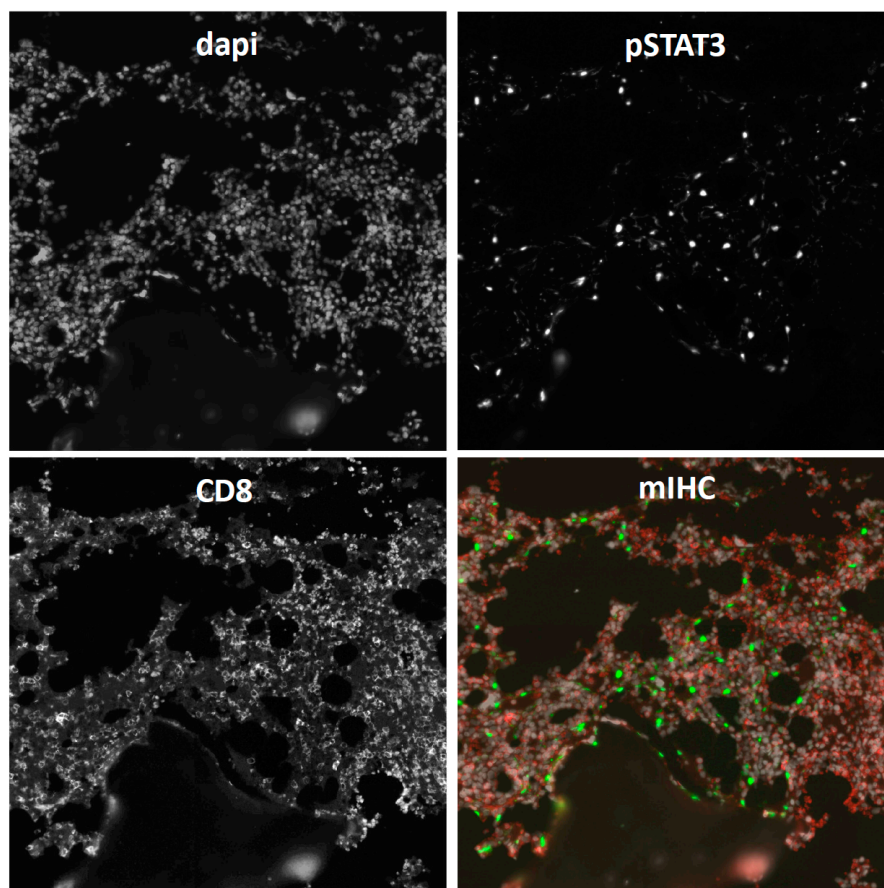

**Figure S5.** Multiplex immunohistochemistry (mIHC) staining of pSTAT3<sup>Tyr705</sup> in CD8<sup>+</sup> large granular lymphocyte (LGL) leukemia as a positive control stain for pSTAT3 antibody. pSTAT3 and CD8 were stained and registered in Cy3 and Cy5 channels, respectively. Dapi was used as nuclear counterstain. The first three images represent single stainings and the last figure their composite image.

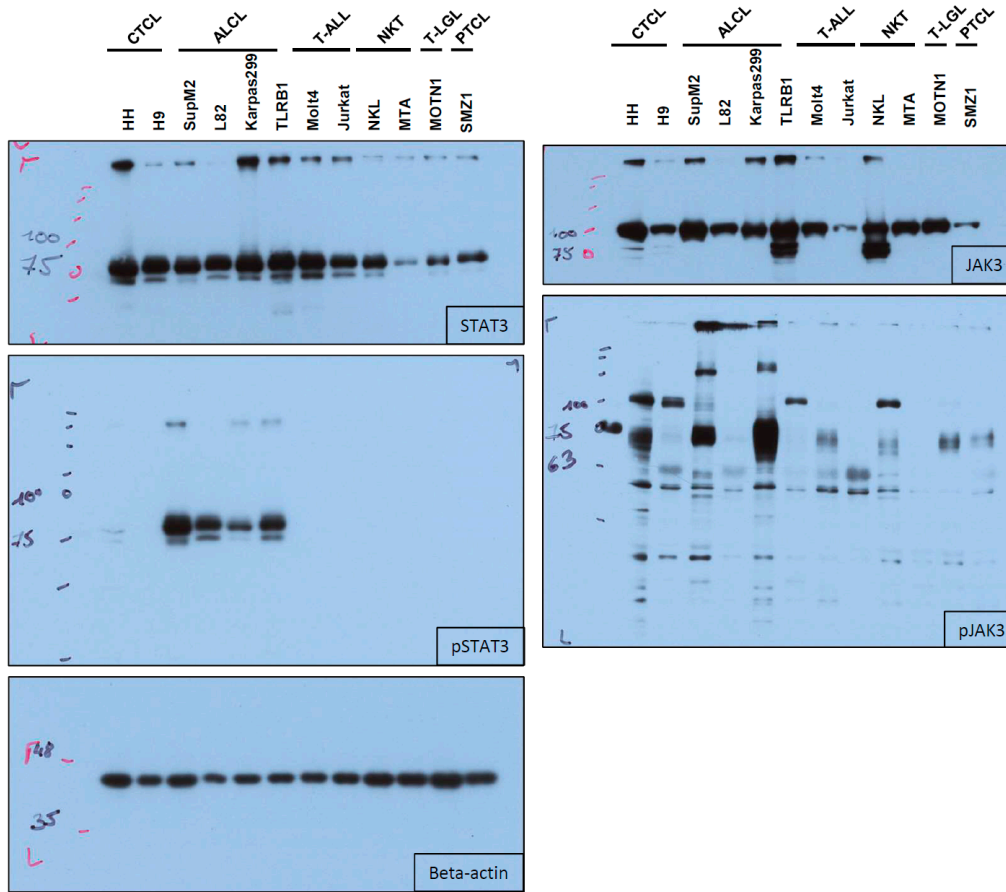

**Figure S6.** Full western blot of p-STAT3 (Tyr705), STAT3, p-JAK3 (Tyr980/981), and JAK3 in T cell malignancy cell lines. Beta-actin is used as a reference protein. Molecular weights are annotated in the left for each corresponding protein as the staining was digitalized with colorimetric detection.

**Table S1.** Cell lines and *JAK/STAT* mutation status.

| Disease | Cell lines | Phenotype                                                                                            | JAK/STAT mutation status                                                                      |
|---------|------------|------------------------------------------------------------------------------------------------------|-----------------------------------------------------------------------------------------------|
| CTCL    | HH         | CTCL, representing aggressive leukemic CD30+ Mycosis Fungoides and/or ALCL                           | no mutations                                                                                  |
|         | H9         | CTCL                                                                                                 | missense JAK1/3                                                                               |
| ALCL    | SUP-M2     | ALCL, ALK+                                                                                           | no mutations                                                                                  |
|         | L82        | ALCL, ALK+                                                                                           | no mutations                                                                                  |
|         | Karpas 299 | ALCL cell line (of T-cell type) derived from a lymphoma termed at the time “histiocytic high grade   | no mutations                                                                                  |
|         | TLBR1      | ALCL, ALK-                                                                                           | missense STAT3 (S614R)                                                                        |
| T-ALL   | MOLT4      | T-ALL                                                                                                | nonsense JAK1<br>missense STAT3 (A406V)                                                       |
|         | Jurkat     | Immature TCR $\alpha\beta$ + T-cell line (type T-III cortical) derived from relapsed childhood T-ALL | nonsense/missense STAT5B (T724M, L165L, L142P and Q368fs)<br>missense STAT3 (R729fs and L78F) |
| NKT     | NKL        | NKT                                                                                                  | no mutations                                                                                  |
|         | MTA        | NKT                                                                                                  | no mutations                                                                                  |
| T-LGL   | MOTN-1     | T-LGL                                                                                                | missense JAK1                                                                                 |
| PTCL    | SMZ-1      | PTCL-NOS                                                                                             | no mutations                                                                                  |

**Table S2.** Clinical and pathological characteristics of PTCL patients.

| Dg        | T %  | P-Stat3% | P-MAPK % | P-AKT% | P-Stat5% | Organ      | Sample type | Sample size (mm) | CD 3 | CD 4 | CD 5 | CD 7 | CD 8 | CD 21 | CD 30 | EB V | MIB % | Gender | Age | Stage | LD  | ECOG | CHOP | HDC T | Relapse/progression | Death | OS time |
|-----------|------|----------|----------|--------|----------|------------|-------------|------------------|------|------|------|------|------|-------|-------|------|-------|--------|-----|-------|-----|------|------|-------|---------------------|-------|---------|
| AITL      | 70   | 52       | 14       | 3      | 1        | LN         | Oper        |                  | 1    | 1    |      |      | 0    | 1     | 0     | 0    | 60    | F      | 59  | 3     | 496 | 3    | 1    | 0     | 0                   | 1     | 572     |
| AITL      | 80   | 33       | 27       | 3      | 2        | LN         | Oper        | 30               | 1    | 0    | 1    |      | 0    | 1     | 0     |      | 50    | M      | 63  | 4     | 350 | 3    | 1    | 1     | 1                   | 1     | 528     |
| AITL      | 65   | 57       | 12       | 8      | 9        | LN         | Oper        | 15               | 1    | 1    | 1    |      | 0    | 1     | 1     | 0    | 55    | F      | 51  | 4     | 634 | 4    | 1    | 1     | 0                   | 0     | 2185    |
| AITL      | 75   | 66       | 4        | 10     | 10       | LN         | Oper        |                  | 1    | 1    | 1    |      |      | 0     | 1     | 0    |       | F      | 85  | 3     | 238 | 4    | 0    | 0     | 0                   | 1     | 26      |
| AITL      | 85   | 54       | 19       | 2      | 15       | LN         | Oper        | 10               | 1    | 1    | 1    |      | 0    |       |       |      | 50    | M      | 57  | 4     | 526 |      | 1    | 1     | 1                   | 1     | 1717    |
| AITL      | 55   | 31       | 15       | 91     | 7        | LN         | Oper        | 10               | 1    | 1    | 1    |      | 1    | 0     | 1     | 1    | 40    | M      | 69  | 3     | 245 | 2    | 1    | 0     | 1                   | 1     | 1115    |
| AITL      | 40   | 25       | 2        | 1      | 0        | LN         | Oper        | 40               | 1    | 1    | 1    |      | 0    | 1     | 0     | 1    |       | M      | 68  | 4     | 530 | 3    | 0    | 0     | 0                   | 0     | 49      |
| AITL      | 35   | 32       | 10       | 1      | 1        | LN         | Oper        | 10               | 1    | 1    |      |      |      |       |       |      |       | M      | 80  | 3     | 534 | 2    | 0    | 0     | 1                   | 1     | 218     |
| AITL      | 75   | 47       | 23       | 9      | 3        | LN         | Oper        |                  | 1    | 1    | 1    | 0    | 0    | 1     | 0     |      | 60    | M      | 61  | 4     | 406 | 2    | 1    | 0     | 1                   | 0     | 218     |
| AITL      | 60   | 23       | 16       | 15     | 10       | LN         | Oper        |                  | 1    | 1    | 1    |      | 0    | 1     | 0     | 0    | 40    | F      | 63  | 4     | 235 | 1    | 1    | 1     | 1                   | 1     | 2621    |
| AITL      | 80   | 21       | 13       | 5      | 5        | LN         | Oper        |                  | 1    | 1    | 1    | 1    | 0    | 1     | 1     |      | 70    | F      | 77  | 3     | 272 | 2    | 1    | 0     | 1                   | 1     | 2601    |
| AITL      | 75   | 49       | 15       | 16     | 2        | LN         | Oper        | 35               | 1    | 1    | 1    | 1    | 0    | 1     | 1     | 0    | 70    | M      | 74  | 3     | 254 | 1    | 1    | 0     | 0                   | 1     | 259     |
| AITL      | 70   | 43       | 1        | 1      | 2        | LN         | Oper        |                  | 1    | 1    | 1    | 1    | 0    | 1     | 0     | 0    | 30    | M      | 78  | 3     | 360 | 1    | 0    | 0     | 0                   | 1     | 308     |
| AITL      | 70   | 25       | 1        | 5      | 4        | LN         | Oper        | 18               | 1    | 1    | 1    | 0    | 0    | 1     | 1     | 0    | 60    | M      | 64  | 4     | 263 | 1    | 1    | 1     | 1                   | 1     | 445     |
| AITL      | 90   | 58       | 31       | 23     | 0        | LN         | Oper        | 30               | 1    | 1    | 1    | 0    | 0    | 1     | 1     |      | 70    | M      | 84  | 3     | 266 | 3    | 0    | 0     | 0                   | 1     | 79      |
| AITL      | 40   | 45       | 17       | 10     | 4        | LN         | Oper        | 45               | 1    | 1    | 1    | 0    | 0    | 1     | 1     | 0    | 90    | M      | 57  | 3     | 237 | 2    | 1    | 0     | 1                   | 1     | 698     |
| AITL      | 70   | 44       | 16       | 16     | 1        | LN         | Oper        | 40               | 1    | 1    | 1    | 0    | 0    | 1     | 1     | 1    | 30    | M      | 67  | 3     | 210 | 1    | 1    | 0     | 1                   | 1     | 4739    |
| AITL      | 60   | 60       | 1        | 1      | 1        | LN         | Oper        | 20               | 1    | 1    | 1    | 0    | 0    | 1     | 0     | 0    | 50    | F      | 86  | 3     | 355 | 1    | 0    | 0     | 0                   | 1     | 62      |
| AITL      | 75   |          |          |        |          | LN         | Oper        | 35               | 1    | 1    | 1    |      | 0    |       |       |      | 40    | M      | 31  | 3     | 372 | 0    | 0    | 1     | 1                   | 1     | 1238    |
| AITL      | 50   | 33       | 12       | 6      | 2        | Oropharynx | Oper        |                  | 1    | 1    | 1    |      | 0    | 1     | 0     |      |       | F      | 74  | 1     | 194 | 1    | 1    | 0     | 1                   | 1     | 2339    |
| AITL      | 95   | 60       | 4        | 1      | 1        | LN         | Oper        | 20               | 1    | 1    | 1    | 1    | 1    |       | 0     |      | 85    | F      | 63  | 3     | 386 | 2    | 1    | 1     | 1                   | 1     | 1466    |
| AITL      | 60   | 65       | 5        | 4      | 1        | LN         | Biopsy      |                  | 1    | 1    | 1    | 1    | 0    | 1     | 0     | 0    | 30    | F      | 68  | 3     | 229 | 1    | 1    | 0     | 0                   | 1     | 125     |
| AITL      | 60   | 51       | 9        | 15     | 1        | LN         | Biopsy      | 10               |      | 1    | 1    | 1    | 0    | 1     | 0     | 0    | 50    | M      | 69  | 3     | 326 | 1    | 0    | 0     | 0                   | 1     | 282     |
| AITL      | 60   | 62       | 2        | 10     | 1        | LN         | Oper        | 8                | 1    | 1    | 1    |      | 0    | 0     | 0     | 0    | 40    | F      | 45  | 4     | 448 | 1    | 1    | 1     | 0                   | 0     | 2284    |
| AITL      | 60   | 51       | 7        | 2      | 1        | LN         | Biopsy      |                  | 1    | 1    | 1    | 1    | 0    | 1     | 0     | 0    | 60    | F      | 79  | 2     | 212 | 0    | 0    | 0     | 1                   | 1     | 392     |
| AITL      | 18.4 | 3.3      | 5.4      |        |          | LN         | Oper        | 40               | 1    | 1    | 1    | 1    | 0    |       | 1     |      |       | M      | 67  | 2     | 397 | 1    | 1    | 1     | 0                   | 0     | 909     |
| AITL      | 32.3 | 8.9      | 5.9      |        |          | LN         | Oper        | 16               | 1    | 1    | 1    | 0    | 0    | 1     |       | 0    | 35    | F      | 78  | 4     | 303 | 2    | 1    | 0     | 1                   | 0     | 1322    |
| AITL      | 39.0 | 9.9      | 8.5      |        |          | LN         | Oper        | 25               | 1    | 1    | 1    | 0    | 1    | 0     |       | 0    | 70    | F      | 67  | 3     | 353 | 3    | 1    | 0     | 1                   | 1     | 260     |
| AITL      | 49.6 | 3.8      | 8.6      |        |          | LN         | Oper        | 14               | 1    | 1    | 1    | 1    | 1    | 1     |       | 0    | 50    | M      | 66  | 4     | 265 | 1    | 1    | 1     | 0                   | 1     | 603     |
| AITL      | 40.9 | 3.8      | 4.1      |        |          | LN         | Oper        | 35               | 1    | 1    | 1    | 1    |      | 1     | 1     |      |       | M      | 40  | 4     | 241 | 1    | 1    | 1     | 0                   | 0     | 2059    |
| ALCL-ALK- | 90   | 3        | 4        | 7      | 1        | LN         | Oper        | 35               | 0    | 1    | 0    |      | 0    |       | 1     | 0    | 90    | M      | 70  | 3     | 268 | 1    | 1    | 0     |                     | 1     | 1254    |
| ALCL-ALK- | 96   | 8        | 1        | 2      | 0        | LN         | Oper        |                  | 1    | 0    | 0    |      | 0    |       | 1     |      | 90    | F      | 46  | 2     | 178 | 0    | 1    | 0     | 1                   | 0     | 4743    |
| ALCL-ALK- | 90   | 96       | 4        | 6      | 1        | LN         | Biopsy      |                  | 0    | 0    | 0    | 0    | 0    |       | 1     |      | 90    | F      | 40  | 4     | 229 | 2    | 1    | 1     | 0                   | 0     | 3237    |
| ALCL-ALK- | 90   | 90       | 1        | 11     | 4        | LN         | Oper        |                  |      | 1    | 1    | 0    | 0    |       | 1     |      | 90    | F      | 84  | 4     | 169 | 4    | 0    | 0     |                     | 1     | 54      |
| ALCL-ALK- | 90   | 80       | 10       | 50     | 28       | LN         | Oper        |                  | 0    | 1    |      | 0    |      |       | 0     | 0    | 95    | F      | 73  | 4     | 175 | 3    | 1    | 0     | 1                   | 1     | 298     |
| ALCL-ALK- | 50   | 92       | 1        | 0      | 69       | LN         | Oper        | 30               | 0    | 1    | 0    | 0    | 0    |       | 1     |      | 60    | F      | 44  | 2     | 212 | 1    | 1    | 1     | 0                   | 0     | 1982    |
| ALCL-ALK- | 60   | 58       | 29       | 61     | 6        | LN         | Biopsy      |                  | 0    | 1    | 0    | 0    | 0    |       | 1     | 0    |       | M      | 60  | 2     | 364 |      | 0    | 0     | 1                   | 1     | 2008    |
| ALCL-ALK- | 85   | 72       | 7        |        | 9        | LN         | Oper        |                  | 0    | 1    | 1    |      | 0    |       | 1     |      | 90    | M      | 59  | 4     |     | 4    | 0    | 0     |                     | 1     | 13      |
| ALCL-ALK- |      | 83.5     | 1.4      | 4.5    |          | LN         | Oper        | 40               | 0    | 1    |      | 0    | 0    | 0     | 1     | 0    |       | F      | 50  | 4     | 279 | 1    | 1    | 0     | 0                   | 0     | 1519    |
| ALCL-ALK- |      | 23.0     | 6.8      | 18.6   |          | LN         | Oper        | 15               | 1    | 1    | 1    | 1    | 0    |       | 1     | 0    | 90    | M      | 86  | N/D   | N/D | 3    | 0    | 0     |                     | 1     | 245     |
| ALCL-ALK- |      | 71.5     | 11.6     | 15.5   |          | LN         | Oper        |                  | 0    | 0    | 0    | 0    | 0    |       | 1     | 0    | 75    | M      | 66  | 4     | 366 | 2    | 1    | 0     | 0                   | 1     | 75      |
| ALCL-ALK- |      | 92.4     | 5.8      | 12.4   |          | LN         | Oper        | 10               | 0    | 1    | 0    | 1    | 0    |       | 1     | 0    | 75    | M      | 53  | 4     | 136 | 1    | 1    | 1     | 1                   | 1     | 696     |
| ALCL-ALK- |      | 40.8     | 3.9      | 14.9   |          | LN         | Oper        | 40               | 1    | 1    | 1    | 1    | 0    |       | 1     |      | 90    | M      | 49  | 4     | 774 |      | 1    | 0     | 0                   | 0     | 1225    |
| ALCL-ALK+ | 90   | 85       | 4        | 1      | 1        | Oropharynx | Oper        |                  | 0    | 1    | 0    |      | 1    |       | 1     |      |       | F      | 30  | 4     | 187 | 1    | 1    | 0     | 0                   | 0     | 2166    |
| ALCL-ALK+ | 20   |          |          |        |          | LN         | Oper        |                  | 0    | 1    |      | 0    |      |       | 1     |      | 90    | M      | 29  | 4     | 172 | 4    | 1    | 0     | 0                   | 0     | 2059    |



|              |    |      |     |      |    |            |        |    |   |   |   |   |   |   |    |    |    |    |     |          |     |   |   |   |      |      |      |
|--------------|----|------|-----|------|----|------------|--------|----|---|---|---|---|---|---|----|----|----|----|-----|----------|-----|---|---|---|------|------|------|
| ALCL<br>ALK+ | 75 | 90   | 5   | 4    | 7  | LN         | Oper   |    | 0 | 1 | 0 | 0 | 0 | 1 | 80 | F  | 42 | 3  | 186 | 1        | 1   | 0 | 0 | 0 | 3694 |      |      |
| ALCL<br>ALK+ | 90 | 80   | 2   | 0    | 0  | LN         | Biopsy |    | 0 | 1 | 1 |   | 1 | 1 | 0  | 80 | F  | 13 | 3   | 151      | 0   | 0 | 0 | 0 | 2002 |      |      |
| ALCL<br>ALK+ | 90 | 70   | 2   | 1    | 0  | LN         | Oper   | 10 | 0 | 1 | 1 | 1 | 1 | 1 | 1  | 75 | M  | 8  | 4   |          |     |   |   | 1 | 97   |      |      |
| ALCL<br>ALK+ |    | 75.8 | 1.9 | 3.3  |    | LN         | Biopsy |    | 0 | 1 | 1 | 0 | 0 | 1 | 80 | F  | 71 | 3  | 191 | 1        | 1   | 0 | 0 | 0 | 1479 |      |      |
| ALCL<br>ALK+ |    | 80.9 |     | 17.4 |    | LN         | Oper   | 40 | 0 | 1 | 0 | 1 | 0 | 1 | 70 | F  | 31 | 3  | 168 | 1        | 1   | 0 | 0 | 0 | 1594 |      |      |
| ALCL<br>ALK+ |    | 76.0 | 1.5 | 7.3  |    | LN         | Biopsy |    | 0 | 1 | 0 | 0 | 0 | 1 | 70 | M  | 67 | 2  | 152 | 0        | 1   | 0 |   | 0 | 1526 |      |      |
| PTCL<br>NOS  | 90 | 8    | 19  | 1    | 1  | LN         | Oper   | 65 | 1 | 1 | 1 |   | 0 | 0 | 1  | 70 | M  | 70 | 4   | 468      | 3   | 1 | 0 | 1 | 1    | 213  |      |
| PTCL<br>NOS  | 85 | 4    | 1   | 0    | 0  | LN         | Oper   | 20 | 1 | 1 | 1 |   | 0 | 0 | 0  | 0  | M  | 47 | 4   | 673      | 1   | 1 | 1 | 1 | 0    | 819  |      |
| PTCL<br>NOS  | 80 | 14   | 2   | 4    | 5  | LN         | Oper   | 25 | 1 | 1 | 1 |   | 0 | 0 | 0  |    | F  | 79 | 2   | 248      | 1   | 0 | 0 | 0 | 1    | 4199 |      |
| PTCL<br>NOS  | 70 | 37   | 0   | 1    | 0  | Pancreas   | Oper   | 14 | 1 | 1 | 1 |   | 0 | 0 | 0  |    | F  | 52 | 2   | 265      | 1   | 1 | 1 | 0 | 0    | 5193 |      |
| PTCL<br>NOS  | 75 | 18   | 9   | 7    | 3  | LN         | Oper   | 20 | 1 | 1 | 1 |   | 0 | 1 |    | M  | 47 | 3  | 388 | 0        | 1   | 1 | 0 | 1 | 197  |      |      |
| PTCL<br>NOS  | 30 | 9    | 2   | 7    | 10 | Oropharynx | Oper   |    | 1 | 1 | 1 | 1 | 1 | 0 | 0  | 50 | M  | 41 | 2   | 220      | 1   | 1 | 1 | 0 | 0    | 3655 |      |
| PTCL<br>NOS  | 80 | 37   | 5   | 7    | 2  | LN         | Oper   | 20 | 1 | 1 | 1 | 1 | 0 | 1 | 1  | 0  | 80 | F  | 51  | 4        | 404 | 3 | 1 | 1 | 0    | 0    | 3196 |
| PTCL<br>NOS  | 80 | 33   | 6   | 0    | 5  | LN         | Biopsy | 43 | 1 | 1 | 1 | 1 | 0 | 0 | 1  | 1  | 70 | F  | 80  | 4        | 435 | 0 | 0 | 0 | 1    | 1    | 538  |
| PTCL<br>NOS  |    | 87.4 | 6.6 | 12.1 |    | LN         | Oper   | 11 | 1 | 1 | 1 | 1 | 0 | 1 | 1  | 0  | 70 | M  | 47  | 3        | 333 | 1 | 1 | 1 | 1    | 0    | 1729 |
| PTCL<br>NOS  |    | 6.3  | 7.6 | 1.6  |    | LN         | Oper   | 23 | 1 | 1 | 1 | 1 | 0 | 0 |    | 70 | M  | 64 | 4   | 320<br>0 | 3   | 1 | 1 | 1 | 1    | 378  |      |
| PTCL<br>NOS  |    | 59.4 | 1.6 | 11.8 |    | LN         | Oper   | 20 | 1 | 1 | 1 | 1 | 1 |   | 0  |    | M  | 42 | 4   | 349      | 3   | 1 | 1 | 0 | 1    | 207  |      |
| PTCL<br>NOS  |    | 20.0 | 2.0 | 10.3 |    | LN         | Oper   | 25 | 1 | 1 | 1 | 1 | 0 | 0 |    | 60 | M  | 79 | 1   | 121      | 2   | 0 | 0 |   | 1    | 1407 |      |

Abbreviations. Diagnosis (Dg). Tumor proportion (T%). Lymph node (LN). Lactate dehydrogenase from blood (LD). Overall survival time (OS time).

**Table 3.** Locus-specific primers for *STAT3* and *STAT5B* exons and RHOA G17V mutation hotspot.

| Site               | Forward primer             | Reverse primer           |
|--------------------|----------------------------|--------------------------|
| STAT3 exon 2       | TCCCCATCACCTGTACCCAT       | TGACACCTGTGTTGGGCAAT     |
| STAT3 exon 3       | ACACTAACACCCGACTCTGC       | TGTATGCGTCGGCTTCAGAG     |
| STAT3 exon 4       | TCCATTCCCTCCAGACCAGG       | GCTCTGAAGCCTTTGTTCCG     |
| STAT3 exon 5       | CCGAGGCTTGTAACCTTGCAT      | TCCCTTCCTCTTGTGATGG      |
| STAT3 exon 6       | GACCAGGCTCCTTTGAGGAC       | CTCTTGGGGATACTGCCTGC     |
| STAT3 exon 7       | CCGATCTAGGCAGATGTTGG       | TCCCTCAGGTCAAGGAGTTT     |
| STAT3 exon 8       | CTGTGGGCCTGCAGTTAAGA       | GTTCTGCTCTGGAGTTGACT     |
| STAT3 exon 9       | AAGAGAAGATGGGCTCACGC       | TCCCTTCTCCATCTCACCT      |
| STAT3 exon 10      | TGGAAAGAATGACCCTGGCC       | CACGTGGTAGAGTGAGAGGC     |
| STAT3 exon 11      | AATGCACCCCAAGGCTTTTG       | CCTCCACAGTGCTGAGATT      |
| STAT3 exon 12-14   | CAAGGAAAACACCCAGTTG        | AAATAACAGGTGGTCAAAGTAGGC |
| STAT3 exon 15      | ATTGCCAGATGGGATGCCAA       | CCACACCTGGCCTAAGAGTG     |
| STAT3 exon 16      | GAGGAGAACTGCCAGCTCAG       | CCTTTCATTCTGAGCCCCGT     |
| STAT3 exon 17      | AGGGAGAAGGGGTGAAATGC       | TGCCCCCTCCTTTTAGTTGG     |
| STAT3 exon 18      | CCTTGCCAGCCATGTTTTCC       | AACCTCTTGACCCCAAGCTG     |
| STAT3 exon 19      | GTGCACACTCTGTCCAACCT       | GCTTGAAGGCCCTGAACTCT     |
| STAT3 exon 20      | GGAGTCAAGGCCATCTCCAC       | TGGATGCCCTGTTAGCAATA     |
| STAT3 exon 21      | CCAAAAAATTAATGCCAGGA       | GGTTCCATGATCTTTCCTTCC    |
| STAT3 exon 22      | CTCACCCAGTGTCCTTCC         | GGCAGATGGAGCTTTCAGA      |
| STAT3 exon 23      | GACCAGCTCTCGGTGTGTAC       | TGGAGACCAGAGTTTGTGGC     |
| STAT3 exon 24      | GGCACTTGTCTAAGAACAACAACA   | AGTTGCAGAGGGTGGACAAC     |
| STAT5B exons 14-15 | CTGACCTCAACAAATAGTAAGTACCC | TTCCAAGTGTTACTCTGGTGTTT  |
| STAT5B exon16      | TGTTGGGGTTTTAAGATTTCC      | CAAATCAGAAATGCCAACATTG   |
| STAT5B exon 17     | CCCAGGGCTGAGACAGTTT        | AGATTGCACCACCGTACTCC     |
| STAT5B exon 18     | TGGATTCCCTTGACCCAGC        | AGATACCCCTTGGTCCCCTC     |
| STAT5B exon 19     | CTGGTGGCCTGTGGGGCTTG       | TCTGTCTGTGCCCCCTCTGCT    |
| RHOA G17V          | TGGAAAATGGCATCAGTTGTTATG   | GCATTGCAGGTAATATCTGTGTTT |
| JAK1 exon 14       | CCACCCACCCCTTTGAAAGA       | ATTGATGTTTCAGGGCCTGGG    |
| JAK1 exon 20       | CCACCAGCTAGCATGTCAGA       | CTGTGTGTTCCGTGGCCTA      |
| JAK1 exon 24       | ACCAGGCACACCTTTGTTCA       | AGGGGATGAAGGAGAGGACC     |
| JAK3 exon 11       | TCTCTGGACCCAGACTGAG        | GTCTCAACAGCAGCAGCAAC     |

**Table 4.** Densitometry readings of western blot stainings.

|                  | <b>β-Actin</b> | <b>JAK3</b> | <b>STAT3</b> | <b>pJAK3</b> | <b>pSTAT3</b> |
|------------------|----------------|-------------|--------------|--------------|---------------|
| <b>HH</b>        | 14546719       | 17062962    | 17023719     | 6057477      | 355163        |
| <b>H9</b>        | 9331062        | 9270477     | 15436477     | 4239406      | 53192         |
| <b>SupM2</b>     | 13836376       | 17276012    | 13283305     | 1165577      | 18000619      |
| <b>L82</b>       | 6454355        | 11489012    | 13808598     | 106778       | 13158012      |
| <b>Karpas299</b> | 8757012        | 13082891    | 17198012     | 680749       | 6562891       |
| <b>TLRB1</b>     | 8803426        | 17857841    | 16716062     | 2462820      | 12840083      |
| <b>Molt4</b>     | 9240719        | 12835719    | 15543184     | 54657        | 0             |
| <b>Jurkat</b>    | 11107305       | 3284891     | 11095184     | 91778        | 0             |
| <b>NKL</b>       | 15404719       | 14683305    | 9410012      | 3615941      | 0             |
| <b>MTA</b>       | 15076891       | 14215719    | 2003355      | 96485        | 0             |
| <b>MOTN1</b>     | 19614669       | 14053426    | 5048305      | 37243        | 0             |
| <b>SMZ1</b>      | 12446477       | 3447891     | 7313962      | 66071        | 0             |

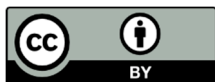

© 2020 by the authors. Licensee MDPI, Basel, Switzerland. This article is an open access article distributed under the terms and conditions of the Creative Commons Attribution (CC BY) license (<http://creativecommons.org/licenses/by/4.0/>).
